# Supplementary material for: Construction of hierarchical NCMTs@MoO2/FeNi3 tubular heterostructures for enhanced performance in catalysis and protein adsorption
Source: Royal Society of Chemistry journal article supplement (doi:10.1039/d4dt01553c), 2024-01-01
Supplement: d4dt01553c1.pdf [file d4dt01553c1.pdf]

## Supporting information

# Construction of NCMTs@MoO<sub>2</sub>/FeNi<sub>3</sub> Hierarchical Tubular Heterostructures for Enhanced Performance in Catalysis and Protein adsorption

Hongxin Wang<sup>a</sup>, Lixian Guo<sup>b\*</sup>, Jianmin Pan<sup>a</sup>, Jingli Xu<sup>a</sup>, Xue-Bo Yin<sup>a</sup>, Min Zhang<sup>\*a</sup>

<sup>a</sup> College of Chemistry and Chemical Engineering, Shanghai University of Engineering Science, Shanghai 201620, China.

<sup>b</sup> Jinan Children's Hospital, Jinan 250022, China.

### Preparation of NCMTs@MoO<sub>2</sub>/FeNi<sub>3</sub>-1

In a typical reaction, 50mg of the as-prepared FeOOH@NiMoO<sub>4</sub> were dispersed in 25 mL methanol under ultrasound for 15 minutes. Then another solution containing 23 mg of hexachloro cyclophosphazene and 52 mg of 4, 4'-sulfonyldiphenol in 6 mL of methanol was added drop by drop. After stirring for 5 minutes, 80  $\mu$ L of triethylamine was added drop wise and the solution was continued to stir for 8 h. The product was collected by centrifugation and washed with water and ethanol for several times before drying at 60 °C overnight. The obtained product was denoted as FeOOH@NiMoO<sub>4</sub>@PZS. Then, the as-prepared FeOOH@NiMoO<sub>4</sub>@PZS powder was placed in a ceramic boat at the middle of a horizontal tube furnace. After heating at 150°C for 1 h and continuously increasing to 500°C and maintaining for 5 h with a ramp rate of 2°C min<sup>-1</sup> in N<sub>2</sub> gas, the obtained black powder was NCMTs@MoO<sub>2</sub>/FeNi<sub>3</sub>-1.

---

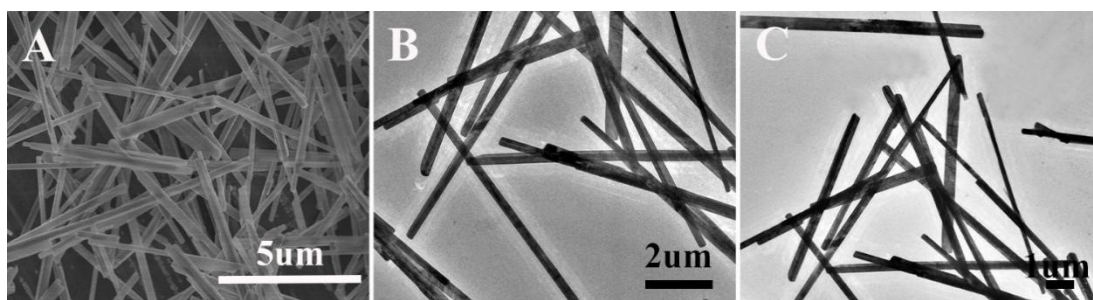

Fig. S1. SEM and TEM images of  $\text{MoO}_3$

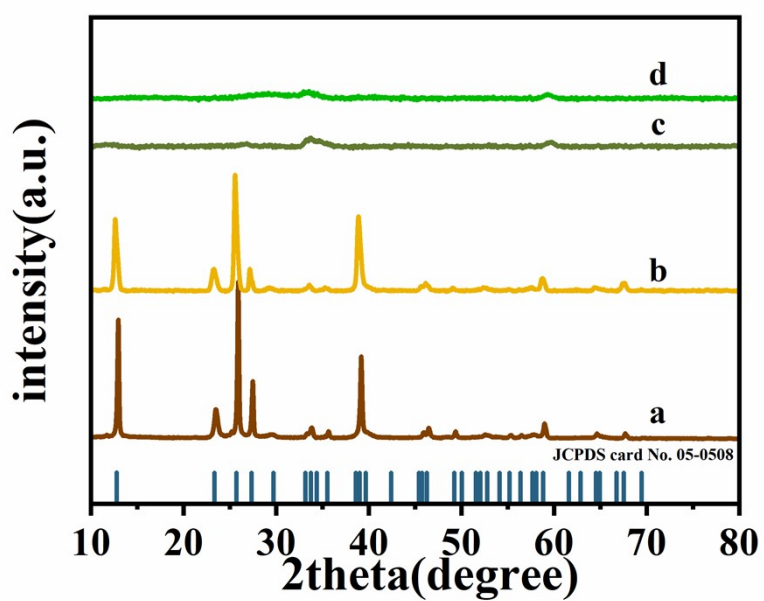

Fig. S2. XRD patterns of  $\text{MoO}_3$ (a) and  $\text{MoO}_3/\text{FeOOH}$ (b);  $\text{FeOOH}/\text{NiMoO}_4$ (c);  $\text{FeOOH}/\text{NiMoO}_4@\text{PDA}$ (d)

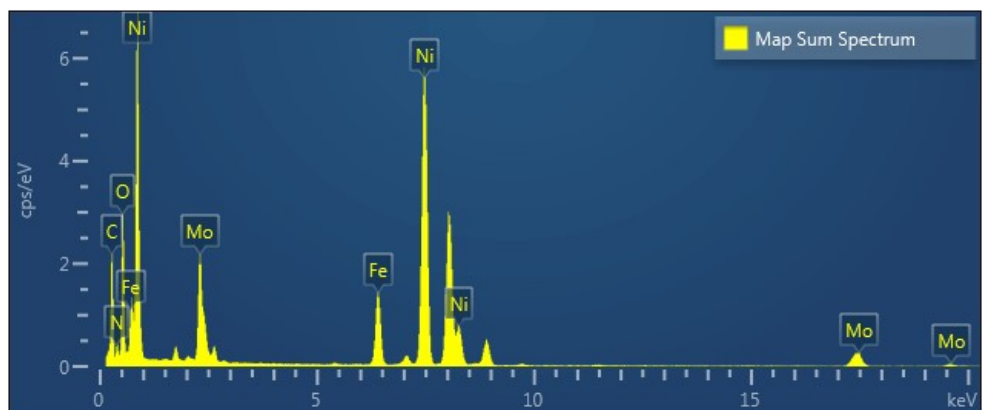

Fig. S3. Energy-dispersive X-rays spectrum of NCMTs@MoO<sub>2</sub>/FeNi<sub>3</sub>.

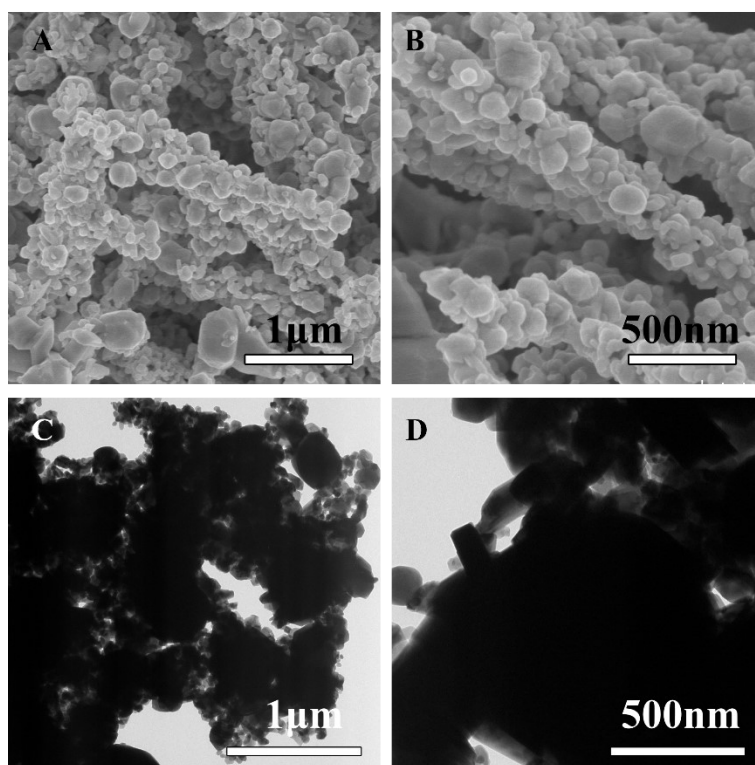

Fig. S4 (A, B) SEM images and (C, D) TEM images of Mo<sub>2</sub>C@Fe<sub>0.64</sub>Ni<sub>0.36</sub>/Ni-900.

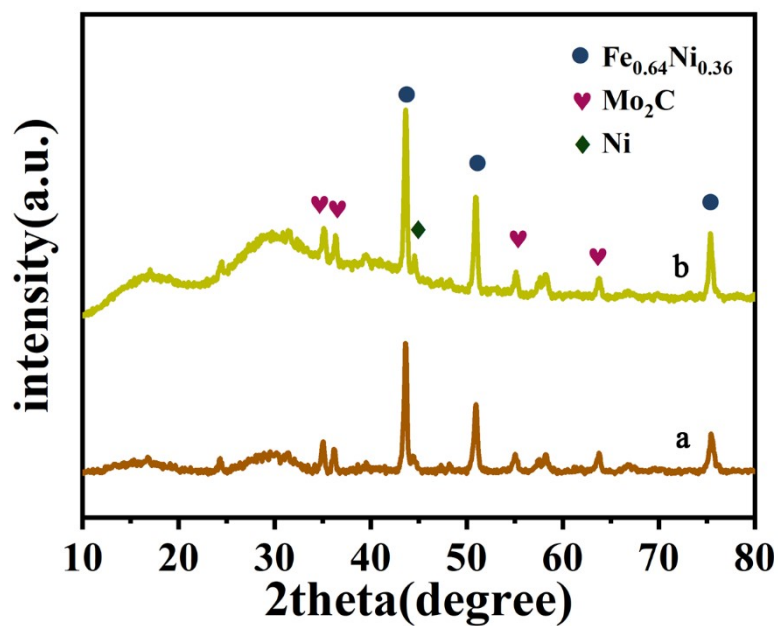

Fig. S5. XRD patterns of (a)  $\text{Mo}_2\text{C}@\text{Fe}_{0.64}\text{Ni}_{0.36}/\text{Ni}-700$  and (b)  $\text{Mo}_2\text{C}@\text{Fe}_{0.64}\text{Ni}_{0.36}/\text{Ni}-900$

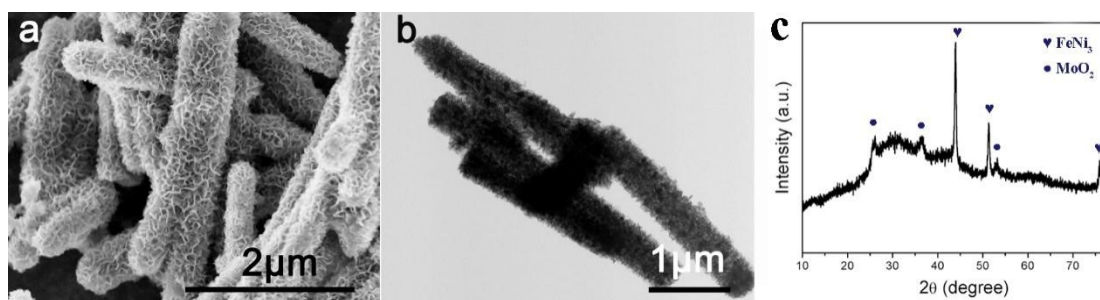

Fig. S6 SEM(a), TEM(b) images and XRD patterns(c) of  $\text{NCMTs}@\text{MoO}_2/\text{FeNi}_3-1$

**Table S1** ICP data and catalysis activity of  $\text{NCMTs}@\text{MoO}_2/\text{FeNi}_3$ ,  $\text{Mo}_2\text{C}@\text{Fe}_{0.64}\text{Ni}_{0.36}/\text{Ni}-700$  and  $\text{Mo}_2\text{C}@\text{Fe}_{0.64}\text{Ni}_{0.36}/\text{Ni}-900$

| Samples                                                              | Nickel content ( $\mu\text{g}/\text{mg}$ ) | $K (\times 10^{-3} \text{s}^{-1})$ | $\kappa (\times 10^{-3} \text{mg}^{-1} \text{s}^{-1})$ |
|----------------------------------------------------------------------|--------------------------------------------|------------------------------------|--------------------------------------------------------|
| $\text{NCMTs}@\text{MoO}_2/\text{FeNi}_3$                            | 429.11                                     | 17.12                              | 39.90                                                  |
| $\text{Mo}_2\text{C}@\text{Fe}_{0.64}\text{Ni}_{0.36}/\text{Ni}-700$ | 215.67                                     | 6.94                               | 32.18                                                  |
| $\text{Mo}_2\text{C}@\text{Fe}_{0.64}\text{Ni}_{0.36}/\text{Ni}-900$ | 373.97                                     | 3.04                               | 8.13                                                   |

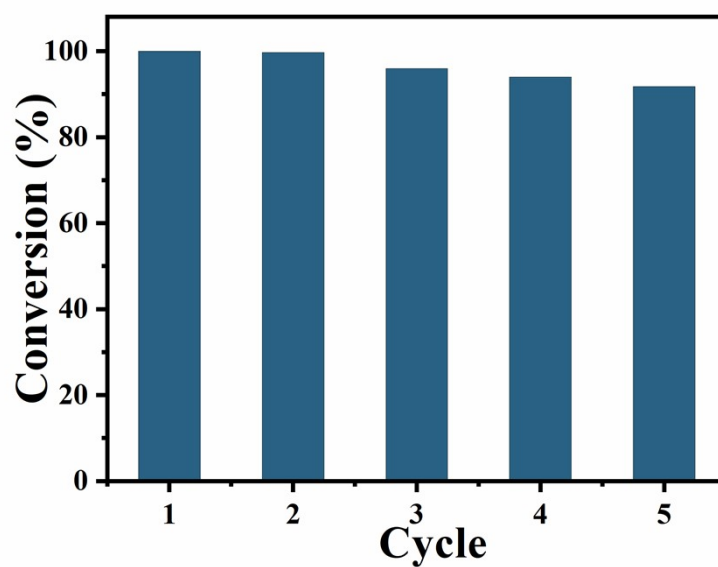

Fig. S7 The recyclability of the NCMTs@MoO<sub>2</sub>/FeNi<sub>3</sub> as the catalyst for 4-nitrophenol

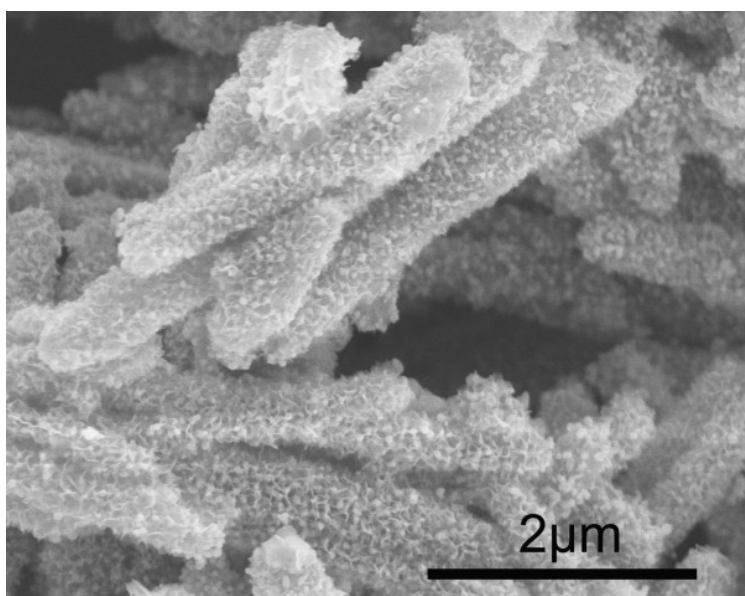

Fig. S8 SEM images of NCMTs@MoO<sub>2</sub>/FeNi<sub>3</sub> after five catalytic reactions

**Table S2.** the estimate of Langmuir model and Freundlich model

| Langmuir       |        |                | Freundlich     |      |                |
|----------------|--------|----------------|----------------|------|----------------|
| Q <sub>m</sub> | b      | R <sup>2</sup> | Q <sub>m</sub> | n    | R <sup>2</sup> |
| 943.40         | 0.0319 | 0.9979         | 58.74          | 1.87 | 0.9540         |
